# Supplementary material for: An integer linear programming approach for finding deregulated subgraphs in regulatory networks
Source: PubMed Central journal article supplement — Nucleic Acids Res. 2011 Dec 29;40(6):e43. doi: 10.1093/nar/gkr1227 (PMC3315310; doi:10.1093/nar/gkr1227), 2011-12-29
Supplement: supp_gkr1227_nar-02055-met-n-2011-File010.pdf [file supp_gkr1227_nar-02055-met-n-2011-File010.pdf]

# Supplemental Material

## List of Figures

|   |                                                                                                                                                                                |   |
|---|--------------------------------------------------------------------------------------------------------------------------------------------------------------------------------|---|
| 1 | Deregulated network for the glioma data set computed with BioNet. The yellow nodes are also part of the deregulated (directed) network computed with our ILP approach. . . . . | 3 |
| 2 | Significantly enriched regulatory pathways found in the computed subnetworks of size 25 for the different colorectal adenocarcinoma cell lines. . . . .                        | 4 |

## List of Tables

|    |                                                                                                                                                                          |    |
|----|--------------------------------------------------------------------------------------------------------------------------------------------------------------------------|----|
| 1  | Overview of network-based tools and algorithms . . . . .                                                                                                                 | 5  |
| 2  | Significantly enriched pathways which are covered by the genes of the deregulated subgraph of size 25 for BRCA1 mutation carriers versus non-mutation carriers . . . . . | 7  |
| 3  | List of genes found in the 16 computed deregulated subgraphs of sizes 10-25 and number of occurrences for HCT116 at 8h . . . . .                                         | 8  |
| 4  | Significantly enriched pathways which are covered by the genes of the deregulated subgraph of size 25 for HCT116 at 8h . . . . .                                         | 9  |
| 5  | List of genes found in the 16 computed deregulated subgraphs of sizes 10-25 and number of occurrences for HCT116 at 24h. . . . .                                         | 10 |
| 6  | Significantly enriched pathways which are covered by the genes of the deregulated subgraph of size 25 for HCT116 at 24h . . . . .                                        | 11 |
| 7  | List of genes found in the 16 computed deregulated subgraphs of sizes 10-25 and number of occurrences for HT29 at 8h. . . . .                                            | 12 |
| 8  | Significantly enriched pathways which are covered by the genes of the deregulated subgraph of size 25 for HT29 at 8h . . . . .                                           | 13 |
| 9  | List of genes found in the 16 computed deregulated subgraphs of sizes 10-25 and number of occurrences for HT29 at 24h. . . . .                                           | 14 |
| 10 | Significantly enriched pathways which are covered by the genes of the deregulated subgraph of size 25 for HT29 at 24h . . . . .                                          | 15 |

## Supplementary Methods

### Building the KEGG regulatory network

In this study, we used the information of the regulatory pathways of the KEGG database to build a human regulatory network as input for our algorithm. We imported the KEGG regulatory network via the Biochemical Network Database (BNDB) [1] that integrates various external network databases. The BNDB is part of the biological information system BN++ [2], which provides importers for different databases, e.g., for the regulatory network databases as KEGG [3–5] or Transpath [6] and for the protein-protein interaction databases as DIP [7], HPRD [8], MINT [9], and IntAct [10]. The usage of the BNDB has the advantage that we have access to the data of different databases using the same interface. In the BNDB, a pathway is modeled as series of events (e.g. reaction, interaction), in which different participants (e.g. genes/proteins) can take part and play different roles (e.g. product, educt). When building the regulatory network, we retrieve all participants and events in the BNDB that are part of a KEGG regulatory pathway and construct a so called compound graph. The compound graph models the participants as nodes and the events as edges between these nodes. Since KEGG pathways also contain protein families, we transform the original KEGG pathways by splitting the nodes of protein families into their components. Given a protein family, we replace the family node by a set of nodes where each node represents a family member. Each new node is connected to all neighbors of the original family node, i.e., it has the same set of incoming and outgoing edges as the original family node, and receives the score of its corresponding gene. Here, we assume that all family members interact in the same manner with the neighboring nodes of the original family node. Furthermore, we apply a splitting of protein complexes that contain protein families, such that we create a new protein complex for each member of the contained protein family. The score of a protein complex is computed by taking the minimum score of its components, because we assume that the component with lowest amount is the limiting factor for building the complex. For the mapping of the genes and their scores to the nodes of this network, we used the NCBI Gene identifier.

## Supplementary Figures

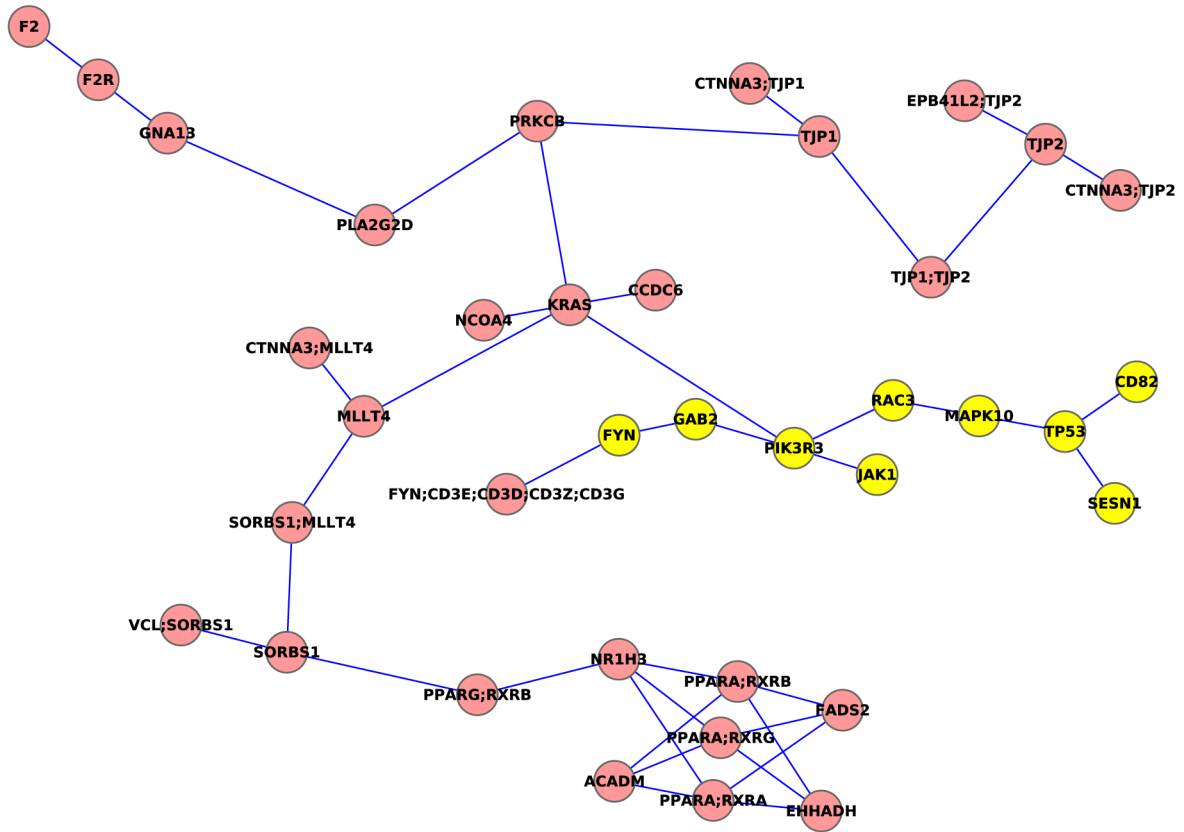

Figure 1: Deregulated network for the glioma data set computed with BioNet. The yellow nodes are also part of the deregulated (directed) network computed with our ILP approach.

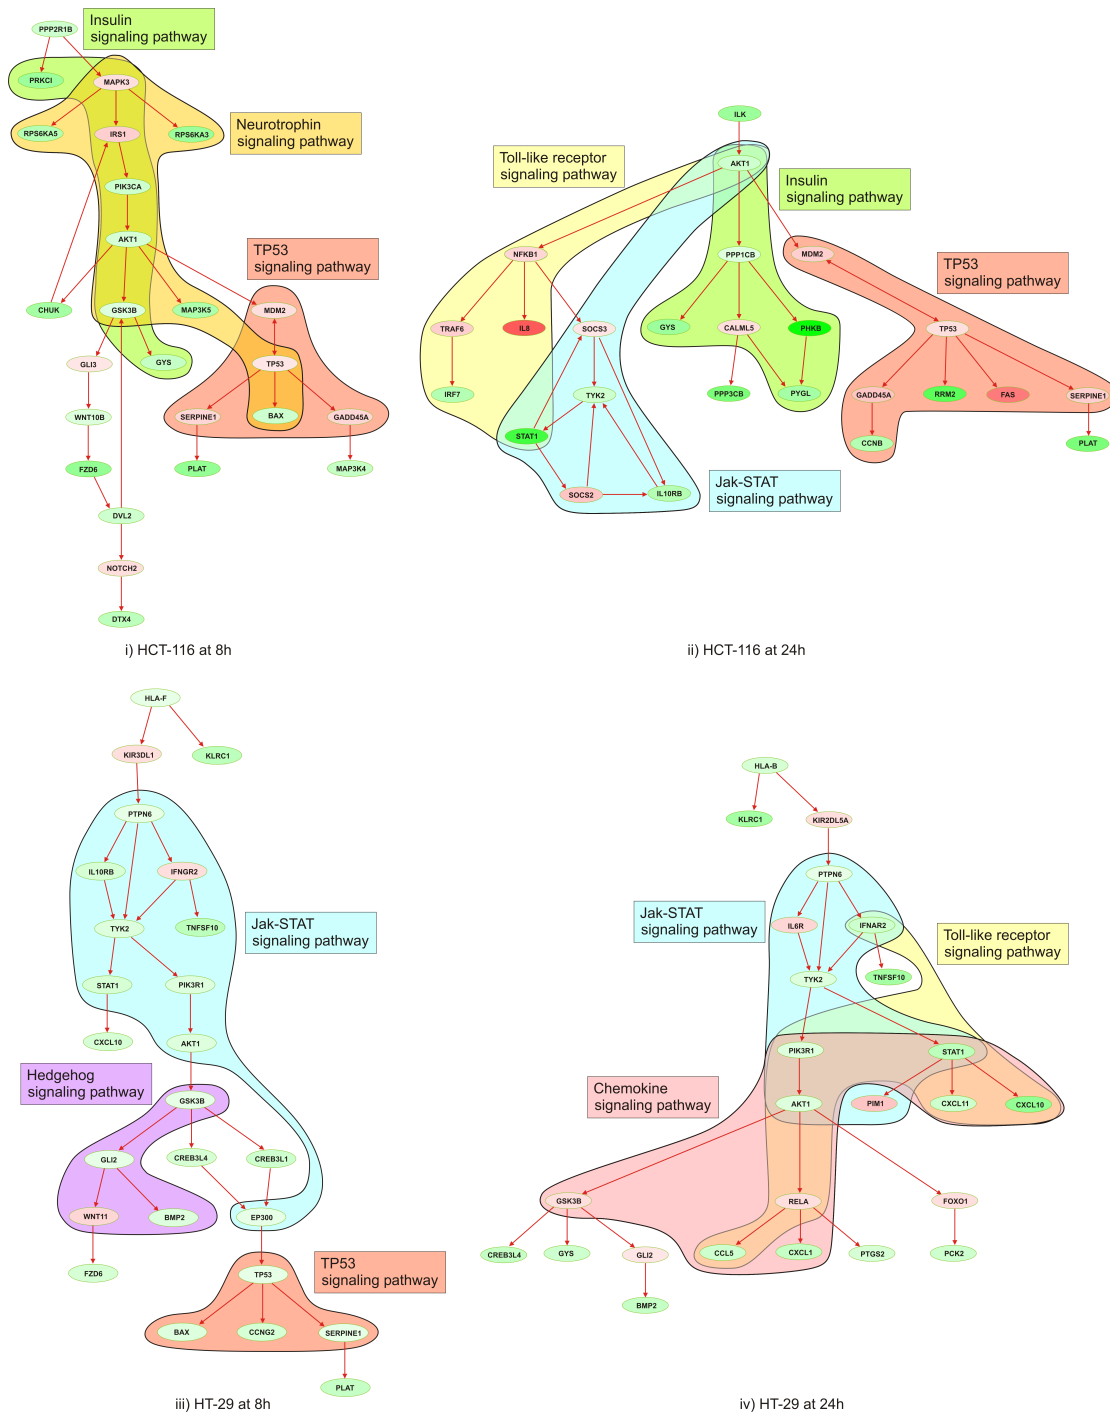

Figure 2: Significantly enriched regulatory pathways found in the computed subnetworks of size 25 for the different colorectal adenocarcinoma cell lines.

## Supplementary Tables

Table 1: Overview of network-based tools and algorithms

| Tool/Algorithm                                                                        | advantages                                                                                                                                                                                                        | disadvantages                                                                         | availability                                                                                                        |
|---------------------------------------------------------------------------------------|-------------------------------------------------------------------------------------------------------------------------------------------------------------------------------------------------------------------|---------------------------------------------------------------------------------------|---------------------------------------------------------------------------------------------------------------------|
| our ILP                                                                               | takes network direction into account<br><br>computes the optimal result according to the scoring method<br>fast run-time for subnetwork sizes 10-25<br>visualization of the results in BiNA [2] or Cytoscape [11] | runtime can be exponential                                                            | <a href="http://genetrail.bioinf.uni-sb.de/ilp/">http://genetrail.bioinf.uni-sb.de/ilp/</a>                         |
| BioNet [12]                                                                           | computes the optimal result according to the scoring method<br><br>subnetwork size is controlled by the FDR (false discovery rate)<br>integration of multivariate p-values                                        | runtime can be exponential<br><br>direction in network is not taken into account      | <a href="http://bionet.bioapps.biozentrum.uni-wuerzburg.de/">http://bionet.bioapps.biozentrum.uni-wuerzburg.de/</a> |
| jActiveModules [13]                                                                   | integrated in Cytoscape<br><br>integration of multivariate p-values                                                                                                                                               | heuristic<br><br>often results are very large modules that are difficult to interpret | plugin in Cytoscape                                                                                                 |
| derivatives of jActiveModules have been developed and expanded in later works [14–17] |                                                                                                                                                                                                                   | heuristics                                                                            |                                                                                                                     |
| ILP of Zhao <i>et al.</i> [18]                                                        | computes the optimal result according to the scoring method                                                                                                                                                       | runtime can be exponential<br>direction in network is not taken into account          |                                                                                                                     |
| OptDis [19]                                                                           | computes the optimal result according to the scoring method                                                                                                                                                       | runtime only fast for very small subnetworks (sizes $\ll 10$ )                        | <a href="http://www.cs.sfu.ca/~pdao/personal/OptDis.html">http://www.cs.sfu.ca/~pdao/personal/OptDis.html</a>       |
| HotNet [20]                                                                           | identifies significantly mutated subnetworks                                                                                                                                                                      | approximation algorithm<br><br>direction in network is not taken into account         | <a href="http://cs.brown.edu/people/braphael/software.html">http://cs.brown.edu/people/braphael/software.html</a>   |
| FiDePa [21]                                                                           | uses a dynamic programming approach (cubic running time)<br>takes network direction into account                                                                                                                  | computes only simple deregulated paths                                                |                                                                                                                     |
| DEGAS [22, 23]                                                                        | integrated into the MATISSE software                                                                                                                                                                              | heuristic<br><br>direction in network is not taken into account                       | <a href="http://acgt.cs.tau.ac.il/matisse">http://acgt.cs.tau.ac.il/matisse</a>                                     |

|                            |                                                               |                                                                                                                                    |                                                                                                       |
|----------------------------|---------------------------------------------------------------|------------------------------------------------------------------------------------------------------------------------------------|-------------------------------------------------------------------------------------------------------|
| RegMOD [24]                | employs a regression model                                    | direction in network is not taken into account                                                                                     |                                                                                                       |
| Su <i>et al.</i> [25]      | dynamic programming                                           | computes simple discriminative paths and combines them greedily into subnetworks<br>direction in network is not taken into account |                                                                                                       |
| Fortney <i>et al.</i> [26] | incorporates topological modularity into the subnetwork score | heuristic<br><br>direction in network is not taken into account                                                                    | <a href="http://www.cs.utoronto.ca/~juris/data/GB10/">http://www.cs.utoronto.ca/~juris/data/GB10/</a> |
| Wu <i>et al.</i> [27]      | prediction of a drug effect on network activities             | direction in network is not taken into account<br>optimal solution not guaranteed (LP relaxation of the problem)                   |                                                                                                       |
| NetCover [28]              | computes coordinately dysregulated subnetworks                | approximation algorithm<br>direction in network is not taken into account                                                          |                                                                                                       |

Table 2: Significantly enriched pathways which are covered by the genes of the deregulated subgraph of size 25 for BRCA1 mutation carriers versus non-mutation carriers. The p-values were computed by using the hypergeometric distribution test (ORA) with the genes of the subgraph as test set and the genes of the regulatory graph as reference set. The p-values are FDR adjusted.

| Pathway Source | Pathway Name                                               | p-value     | number of genes in subgraph |
|----------------|------------------------------------------------------------|-------------|-----------------------------|
| KEGG           | Pathways in cancer                                         | 0.000442969 | 12                          |
| KEGG           | MAPK signaling pathway                                     | 0.000442969 | 11                          |
| KEGG           | Focal adhesion                                             | 0.000442969 | 10                          |
| KEGG           | VEGF signaling pathway                                     | 3.22812e-07 | 10                          |
| KEGG           | Neurotrophin signaling pathway                             | 4.64128e-05 | 9                           |
| KEGG           | Renal cell carcinoma                                       | 5.15226e-07 | 9                           |
| KEGG           | T cell receptor signaling pathway                          | 0.000288768 | 8                           |
| KEGG           | Toll-like receptor signaling pathway                       | 0.000442969 | 7                           |
| KEGG           | ErbB signaling pathway                                     | 0.000442969 | 7                           |
| KEGG           | GnRH signaling pathway                                     | 0.000482278 | 7                           |
| KEGG           | Insulin signaling pathway                                  | 0.00272689  | 7                           |
| KEGG           | Chemokine signaling pathway                                | 0.00333032  | 7                           |
| MSigDB         | BOQUEST CD31PLUS VS CD31MINUS UP                           | 0.017504    | 7                           |
| KEGG           | Glioma                                                     | 0.000452846 | 6                           |
| KEGG           | Pancreatic cancer                                          | 0.000587537 | 6                           |
| KEGG           | Fc epsilon RI signaling pathway                            | 0.000879813 | 6                           |
| KEGG           | Colorectal cancer                                          | 0.00118209  | 6                           |
| KEGG           | B cell receptor signaling pathway                          | 0.00333032  | 5                           |
| MSigDB         | HYPOXIA REVIEW                                             | 0.00484667  | 5                           |
| KEGG           | Chronic myeloid leukemia                                   | 0.00486093  | 5                           |
| KEGG           | Bladder cancer                                             | 0.00235075  | 4                           |
| KEGG           | mTOR signaling pathway                                     | 0.00507319  | 4                           |
| KEGG           | Epithelial cell signaling in Helicobacter pylori infection | 0.00507319  | 4                           |
| KEGG           | Non-small cell lung cancer                                 | 0.00670911  | 4                           |
| KEGG           | Endometrial cancer                                         | 0.00803437  | 4                           |
| MSigDB         | SHEPARD CRASH AND BURN MUT VS WT UP                        | 0.00860306  | 4                           |
| MSigDB         | CHEN HOXA5 TARGETS UP                                      | 0.00922605  | 4                           |
| MSigDB         | HYPOXIA NORMAL UP                                          | 0.0130697   | 4                           |
| MSigDB         | METPATHWAY                                                 | 0.014913    | 4                           |
| MSigDB         | KERATINOCYTEPATHWAY                                        | 0.0205406   | 4                           |
| KEGG           | Melanoma                                                   | 0.0206123   | 4                           |
| KEGG           | p53 signaling pathway                                      | 0.0210982   | 4                           |
| KEGG           | Fc gamma R-mediated phagocytosis                           | 0.0210982   | 4                           |
| MSigDB         | SIG PIP3 SIGNALING IN CARDIAC MYOCYTES                     | 0.0267726   | 4                           |
| KEGG           | Prostate cancer                                            | 0.0273038   | 4                           |
| KEGG           | Small cell lung cancer                                     | 0.0288885   | 4                           |
| KEGG           | Vascular smooth muscle contraction                         | 0.0304471   | 4                           |
| MSigDB         | ST INTEGRIN SIGNALING PATHWAY                              | 0.046262    | 4                           |
| MSigDB         | RAS ONCOGENIC SIGNATURE                                    | 0.0471463   | 4                           |
| MSigDB         | INSULIN SIGNALING                                          | 0.0488835   | 4                           |

Table 3: List of genes found in the 16 computed deregulated subgraphs of sizes 10-25 and number of occurrences for HCT116 at 8h.

| Gene ID | Gene Symbol | Gene Description                                                                              | Number of occurrences in the 16 deregulated subgraphs |
|---------|-------------|-----------------------------------------------------------------------------------------------|-------------------------------------------------------|
| 9252    | RPS6KA5     | ribosomal protein S6 kinase, 90kDa, polypeptide 5                                             | 16                                                    |
| 6197    | RPS6KA3     | ribosomal protein S6 kinase, 90kDa, polypeptide 3                                             | 16                                                    |
| 5595    | MAPK3       | mitogen-activated protein kinase 3                                                            | 16                                                    |
| 5584    | PRKCI       | protein kinase C, iota                                                                        | 16                                                    |
| 5519    | PPP2R1B     | protein phosphatase 2 (formerly 2A), regulatory subunit A, beta isoform                       | 16                                                    |
| 5290    | PIK3CA      | phosphoinositide-3-kinase, catalytic, alpha polypeptide                                       | 16                                                    |
| 4217    | MAP3K5      | mitogen-activated protein kinase kinase kinase 5                                              | 16                                                    |
| 3667    | IRS1        | insulin receptor substrate 1                                                                  | 16                                                    |
| 207     | AKT1        | v-akt murine thymoma viral oncogene homolog 1                                                 | 16                                                    |
| 1147    | CHUK        | conserved helix-loop-helix ubiquitous kinase                                                  | 16                                                    |
| 7157    | TP53        | tumor protein p53                                                                             | 12                                                    |
| 5327    | PLAT        | plasminogen activator, tissue                                                                 | 12                                                    |
| 5054    | SERPINE1    | serpin peptidase inhibitor, clade E (nexin, plasminogen activator inhibitor type 1), member 1 | 12                                                    |
| 4193    | MDM2        | Mdm2 p53 binding protein homolog (mouse)                                                      | 12                                                    |
| 8323    | FZD6        | frizzled homolog 6 (Drosophila)                                                               | 8                                                     |
| 7480    | WNT10B      | wingless-type MMTV integration site family, member 10B                                        | 8                                                     |
| 2997    | GYS1        | glycogen synthase 1 (muscle)                                                                  | 8                                                     |
| 2932    | GSK3B       | glycogen synthase kinase 3 beta                                                               | 8                                                     |
| 2737    | GLI3        | GLI family zinc finger 3                                                                      | 8                                                     |
| 581     | BAX         | BCL2-associated X protein                                                                     | 6                                                     |
| 1856    | DVL2        | dishevelled, dsh homolog 2 (Drosophila)                                                       | 5                                                     |
| 4853    | NOTCH2      | Notch homolog 2 (Drosophila)                                                                  | 4                                                     |
| 4216    | MAP3K4      | mitogen-activated protein kinase kinase kinase 4                                              | 4                                                     |
| 23220   | DTX4        | deltex homolog 4 (Drosophila)                                                                 | 4                                                     |
| 1647    | GADD45A     | growth arrest and DNA-damage-inducible, alpha                                                 | 4                                                     |
| 818     | CAMK2G      | calcium/calmodulin-dependent protein kinase II gamma                                          | 1                                                     |
| 7409    | VAV1        | vav 1 guanine nucleotide exchange factor                                                      | 1                                                     |
| 7294    | TXK         | TXK tyrosine kinase                                                                           | 1                                                     |
| 6195    | RPS6KA1     | ribosomal protein S6 kinase, 90kDa, polypeptide 1                                             | 1                                                     |
| 5500    | PPP1CB      | protein phosphatase 1, catalytic subunit, beta isoform                                        | 1                                                     |



Table 4: Significantly enriched pathways which are covered by the genes of the deregulated subgraph of size 25 for HCT116 at 8h. The p-values were computed by using the hypergeometric distribution test (ORA) with the genes of the subgraph as test set and the genes of the regulatory graph as reference set. The p-values are FDR adjusted.

| Pathway Source | Pathway Name                         | number of genes in subgraph | p-value (fdr) |
|----------------|--------------------------------------|-----------------------------|---------------|
| KEGG           | Neurotrophin signaling pathway       | 10                          | 1.05932e-05   |
| KEGG           | Colorectal cancer                    | 8                           | 6.44745e-05   |
| KEGG           | Basal cell carcinoma                 | 6                           | 0.000378943   |
| KEGG           | Prostate cancer                      | 7                           | 0.000378943   |
| KEGG           | Pathways in cancer                   | 12                          | 0.000703051   |
| KEGG           | Chronic myeloid leukemia             | 6                           | 0.00164048    |
| KEGG           | Endometrial cancer                   | 5                           | 0.00246245    |
| KEGG           | Bladder cancer                       | 4                           | 0.00409835    |
| KEGG           | Glioma                               | 5                           | 0.0043246     |
| KEGG           | Insulin signaling pathway            | 7                           | 0.0043246     |
| KEGG           | B cell receptor signaling pathway    | 5                           | 0.00475801    |
| KEGG           | Melanoma                             | 5                           | 0.00475801    |
| KEGG           | Pancreatic cancer                    | 5                           | 0.00475801    |
| KEGG           | p53 signaling pathway                | 5                           | 0.00505457    |
| KEGG           | MAPK signaling pathway               | 9                           | 0.00546865    |
| KEGG           | mTOR signaling pathway               | 4                           | 0.00619129    |
| KEGG           | Non-small cell lung cancer           | 4                           | 0.00807308    |
| KEGG           | Apoptosis                            | 5                           | 0.00901418    |
| KEGG           | Acute myeloid leukemia               | 4                           | 0.0135836     |
| KEGG           | Wnt signaling pathway                | 6                           | 0.013908      |
| KEGG           | Melanogenesis                        | 5                           | 0.0186358     |
| KEGG           | Notch signaling pathway              | 3                           | 0.0186358     |
| KEGG           | T cell receptor signaling pathway    | 5                           | 0.0186358     |
| KEGG           | Type II diabetes mellitus            | 3                           | 0.0193725     |
| KEGG           | Dorso-ventral axis formation         | 2                           | 0.0229816     |
| KEGG           | Small cell lung cancer               | 4                           | 0.0340931     |
| KEGG           | ErbB signaling pathway               | 4                           | 0.0356502     |
| KEGG           | Amyotrophic lateral sclerosis (ALS)  | 3                           | 0.0424121     |
| KEGG           | Toll-like receptor signaling pathway | 4                           | 0.0424121     |
| KEGG           | Chemokine signaling pathway          | 5                           | 0.0424222     |
| KEGG           | Hedgehog signaling pathway           | 3                           | 0.0424222     |
| KEGG           | Prion diseases                       | 2                           | 0.0454634     |

Table 5: List of genes found in the 16 computed deregulated subgraphs of sizes 10-25 and number of occurrences for HCT116 at 24h.

| Gene ID | Gene Symbol | Gene Description                                                                              | Number of occurrences in the 16 deregulated subgraphs |
|---------|-------------|-----------------------------------------------------------------------------------------------|-------------------------------------------------------|
| 5500    | PPP1CB      | protein phosphatase 1, catalytic subunit, beta isoform                                        | 16                                                    |
| 5257    | PHKB        | phosphorylase kinase, beta                                                                    | 16                                                    |
| 4790    | NFKB1       | nuclear factor of kappa light polypeptide gene enhancer in B-cells 1                          | 16                                                    |
| 3576    | IL8         | interleukin 8                                                                                 | 16                                                    |
| 207     | AKT1        | v-akt murine thymoma viral oncogene homolog 1                                                 | 16                                                    |
| 7297    | TYK2        | tyrosine kinase 2                                                                             | 15                                                    |
| 7157    | TP53        | tumor protein p53                                                                             | 15                                                    |
| 6772    | STAT1       | signal transducer and activator of transcription 1, 91kDa                                     | 15                                                    |
| 6241    | RRM2        | ribonucleotide reductase M2                                                                   | 15                                                    |
| 4193    | MDM2        | Mdm2 p53 binding protein homolog (mouse)                                                      | 15                                                    |
| 355     | FAS         | Fas (TNF receptor superfamily, member 6)                                                      | 15                                                    |
| 2997    | GYS1        | glycogen synthase 1 (muscle)                                                                  | 15                                                    |
| 5836    | PYGL        | phosphorylase, glycogen, liver                                                                | 12                                                    |
| 5327    | PLAT        | plasminogen activator, tissue                                                                 | 11                                                    |
| 5054    | SERPINE1    | serpin peptidase inhibitor, clade E (nexin, plasminogen activator inhibitor type 1), member 1 | 11                                                    |
| 3611    | ILK         | integrin-linked kinase                                                                        | 9                                                     |
| 9021    | SOCS3       | suppressor of cytokine signaling 3                                                            | 8                                                     |
| 5532    | PPP3CB      | protein phosphatase 3 (formerly 2B), catalytic subunit, beta isoform                          | 8                                                     |
| 51806   | CALML5      | calmodulin-like 5                                                                             | 8                                                     |
| 5290    | PIK3CA      | phosphoinositide-3-kinase, catalytic, alpha polypeptide                                       | 7                                                     |
| 3588    | IL10RB      | interleukin 10 receptor, beta                                                                 | 6                                                     |
| 891     | CCNB1       | cyclin B1                                                                                     | 4                                                     |
| 1647    | GADD45A     | growth arrest and DNA-damage-inducible, alpha                                                 | 4                                                     |
| 8835    | SOCS2       | suppressor of cytokine signaling 2                                                            | 3                                                     |
| 7189    | TRAF6       | TNF receptor-associated factor 6                                                              | 2                                                     |
| 3665    | IRF7        | interferon regulatory factor 7                                                                | 2                                                     |

Table 6: Significantly enriched pathways which are covered by the genes of the deregulated subgraph of size 25 for HCT116 at 24h. The p-values were computed by using the hypergeometric distribution test (ORA) with the genes of the subgraph as test set and the genes of the regulatory graph as reference set. The p-values are FDR adjusted.

| <b>Pathway Source</b> | <b>Pathway Name</b>                   | <b>number of genes in subgraph</b> | <b>p-value (fdr)</b> |
|-----------------------|---------------------------------------|------------------------------------|----------------------|
| KEGG                  | p53 signaling pathway                 | 7                                  | 0.000541376          |
| KEGG                  | Insulin signaling pathway             | 8                                  | 0.00234585           |
| KEGG                  | Toll-like receptor signaling pathway  | 6                                  | 0.00838484           |
| KEGG                  | RIG-I-like receptor signaling pathway | 4                                  | 0.0213575            |
| KEGG                  | Apoptosis                             | 5                                  | 0.0214299            |
| KEGG                  | Starch and sucrose metabolism         | 2                                  | 0.0214299            |
| KEGG                  | Jak-STAT signaling pathway            | 6                                  | 0.0231925            |
| KEGG                  | Bladder cancer                        | 3                                  | 0.0335209            |
| KEGG                  | Glioma                                | 4                                  | 0.0335209            |
| KEGG                  | Neurotrophin signaling pathway        | 5                                  | 0.0335209            |
| KEGG                  | Pancreatic cancer                     | 4                                  | 0.0335209            |
| KEGG                  | Chronic myeloid leukemia              | 4                                  | 0.0390747            |
| KEGG                  | Prostate cancer                       | 4                                  | 0.0434768            |
| KEGG                  | Small cell lung cancer                | 4                                  | 0.049026             |
| KEGG                  | Ubiquitin mediated proteolysis        | 3                                  | 0.049026             |

Table 7: List of genes found in the 16 computed deregulated subgraphs of sizes 10-25 and number of occurrences for HT29 at 8h.

| Gene ID | Gene Symbol | Gene Description                                                                              | Number of occurrences in the 16 deregulated subgraphs |
|---------|-------------|-----------------------------------------------------------------------------------------------|-------------------------------------------------------|
| 8743    | TNFSF10     | tumor necrosis factor (ligand) superfamily, member 10                                         | 16                                                    |
| 3460    | IFNGR2      | interferon gamma receptor 2 (interferon gamma transducer 1)                                   | 16                                                    |
| 7297    | TYK2        | tyrosine kinase 2                                                                             | 14                                                    |
| 6772    | STAT1       | signal transducer and activator of transcription 1, 91kDa                                     | 14                                                    |
| 3627    | CXCL10      | chemokine (C-X-C motif) ligand 10                                                             | 14                                                    |
| 7157    | TP53        | tumor protein p53                                                                             | 12                                                    |
| 5327    | PLAT        | plasminogen activator, tissue                                                                 | 12                                                    |
| 5054    | SERPINE1    | serpin peptidase inhibitor, clade E (nexin, plasminogen activator inhibitor type 1), member 1 | 12                                                    |
| 901     | CCNG2       | cyclin G2                                                                                     | 11                                                    |
| 3588    | IL10RB      | interleukin 10 receptor, beta                                                                 | 10                                                    |
| 90993   | CREB3L1     | cAMP responsive element binding protein 3-like 1                                              | 8                                                     |
| 6300    | MAPK12      | mitogen-activated protein kinase 12                                                           | 8                                                     |
| 5777    | PTPN6       | protein tyrosine phosphatase, non-receptor type 6                                             | 8                                                     |
| 5594    | MAPK1       | mitogen-activated protein kinase 1                                                            | 8                                                     |
| 5295    | PIK3R1      | phosphoinositide-3-kinase, regulatory subunit 1 (alpha)                                       | 8                                                     |
| 3821    | KLRC1       | killer cell lectin-like receptor subfamily C, member 1                                        | 8                                                     |
| 3802    | KIR2DL1     | killer cell immunoglobulin-like receptor, two domains, long cytoplasmic tail, 1               | 8                                                     |
| 3458    | IFNG        | interferon, gamma                                                                             | 8                                                     |
| 3134    | HLA-F       | major histocompatibility complex, class I, F                                                  | 8                                                     |
| 2932    | GSK3B       | glycogen synthase kinase 3 beta                                                               | 8                                                     |
| 2353    | FOS         | FBJ murine osteosarcoma viral oncogene homolog                                                | 8                                                     |
| 207     | AKT1        | v-akt murine thymoma viral oncogene homolog 1                                                 | 8                                                     |
| 1847    | DUSP5       | dual specificity phosphatase 5                                                                | 8                                                     |
| 148327  | CREB3L4     | cAMP responsive element binding protein 3-like 4                                              | 8                                                     |
| 8323    | FZD6        | frizzled homolog 6 (Drosophila)                                                               | 7                                                     |
| 7481    | WNT11       | wingless-type MMTV integration site family, member 11                                         | 7                                                     |
| 2736    | GLI2        | GLI family zinc finger 2                                                                      | 7                                                     |
| 581     | BAX         | BCL2-associated X protein                                                                     | 5                                                     |
| 650     | BMP2        | bone morphogenetic protein 2                                                                  | 4                                                     |
| 2033    | EP300       | E1A binding protein p300                                                                      | 4                                                     |
| 9655    | SOCS5       | suppressor of cytokine signaling 5                                                            | 2                                                     |
| 2535    | FZD2        | frizzled homolog 2 (Drosophila)                                                               | 1                                                     |

Table 8: Significantly enriched pathways which are covered by the genes of the deregulated subgraph of size 25 for HT29 at 8h. The p-values were computed by using the hypergeometric distribution test (ORA) with the genes of the subgraph as test set and the genes of the regulatory graph as reference set. The p-values are FDR adjusted.

| Pathway Source | Pathway Name                              | number of genes in subgraph | p-value (fdr) |
|----------------|-------------------------------------------|-----------------------------|---------------|
| KEGG           | Basal cell carcinoma                      | 6                           | 0.000600589   |
| KEGG           | Prostate cancer                           | 7                           | 0.000600589   |
| KEGG           | Jak-STAT signaling pathway                | 8                           | 0.00132186    |
| KEGG           | Colorectal cancer                         | 6                           | 0.00247764    |
| KEGG           | Huntington's disease                      | 5                           | 0.00247764    |
| KEGG           | Pathways in cancer                        | 11                          | 0.00247764    |
| KEGG           | Melanogenesis                             | 6                           | 0.00746352    |
| KEGG           | Apoptosis                                 | 5                           | 0.0123783     |
| KEGG           | Endometrial cancer                        | 4                           | 0.0123783     |
| KEGG           | Graft-versus-host disease                 | 3                           | 0.0123783     |
| KEGG           | Hedgehog signaling pathway                | 4                           | 0.0123783     |
| KEGG           | Natural killer cell mediated cytotoxicity | 6                           | 0.0164234     |
| KEGG           | B cell receptor signaling pathway         | 4                           | 0.024582      |
| KEGG           | Neurotrophin signaling pathway            | 5                           | 0.024582      |
| KEGG           | Pancreatic cancer                         | 4                           | 0.024582      |
| KEGG           | p53 signaling pathway                     | 4                           | 0.0252623     |
| KEGG           | Antigen processing and presentation       | 3                           | 0.0491967     |
| KEGG           | Non-small cell lung cancer                | 3                           | 0.0491967     |
| KEGG           | Toll-like receptor signaling pathway      | 4                           | 0.0491967     |
| KEGG           | Wnt signaling pathway                     | 5                           | 0.0491967     |
| KEGG           | Chemokine signaling pathway               | 5                           | 0.049626      |

Table 9: List of genes found in the 16 computed deregulated subgraphs of sizes 10-25 and number of occurrences for HT29 at 24h.

| Gene ID | Gene Symbol | Gene Description                                                                      | Number of occurrences in the 16 deregulated subgraphs |
|---------|-------------|---------------------------------------------------------------------------------------|-------------------------------------------------------|
| 8743    | TNFSF10     | tumor necrosis factor (ligand) superfamily, member 10                                 | 16                                                    |
| 7297    | TYK2        | tyrosine kinase 2                                                                     | 16                                                    |
| 6772    | STAT1       | signal transducer and activator of transcription 1, 91kDa                             | 16                                                    |
| 6373    | CXCL11      | chemokine (C-X-C motif) ligand 11                                                     | 16                                                    |
| 5292    | PIM1        | pim-1 oncogene                                                                        | 16                                                    |
| 3627    | CXCL10      | chemokine (C-X-C motif) ligand 10                                                     | 16                                                    |
| 3455    | IFNAR2      | interferon (alpha, beta and omega) receptor 2                                         | 16                                                    |
| 2919    | CXCL1       | chemokine (C-X-C motif) ligand 1 (melanoma growth stimulating activity, alpha)        | 11                                                    |
| 5777    | PTPN6       | protein tyrosine phosphatase, non-receptor type 6                                     | 10                                                    |
| 57292   | KIR2DL5A    | killer cell immunoglobulin-like receptor, two domains, long cytoplasmic tail, 5A      | 10                                                    |
| 3821    | KLRC1       | killer cell lectin-like receptor subfamily C, member 1                                | 10                                                    |
| 3106    | HLA-B       | major histocompatibility complex, class I, B                                          | 10                                                    |
| 5295    | PIK3R1      | phosphoinositide-3-kinase, regulatory subunit 1 (alpha)                               | 7                                                     |
| 2997    | GYS1        | glycogen synthase 1 (muscle)                                                          | 7                                                     |
| 2932    | GSK3B       | glycogen synthase kinase 3 beta                                                       | 7                                                     |
| 207     | AKT1        | v-akt murine thymoma viral oncogene homolog 1                                         | 7                                                     |
| 148327  | CREB3L4     | cAMP responsive element binding protein 3-like 4                                      | 7                                                     |
| 650     | BMP2        | bone morphogenetic protein 2                                                          | 6                                                     |
| 6352    | CCL5        | chemokine (C-C motif) ligand 5                                                        | 6                                                     |
| 5970    | RELA        | v-rel reticuloendotheliosis viral oncogene homolog A (avian)                          | 6                                                     |
| 5595    | MAPK3       | mitogen-activated protein kinase 3                                                    | 6                                                     |
| 3570    | IL6R        | interleukin 6 receptor                                                                | 6                                                     |
| 3458    | IFNG        | interferon, gamma                                                                     | 6                                                     |
| 2736    | GLI2        | GLI family zinc finger 2                                                              | 6                                                     |
| 1847    | DUSP5       | dual specificity phosphatase 5                                                        | 6                                                     |
| 9540    | TP53I3      | tumor protein p53 inducible protein 3                                                 | 5                                                     |
| 7157    | TP53        | tumor protein p53                                                                     | 5                                                     |
| 5743    | PTGS2       | prostaglandin-endoperoxide synthase 2 (prostaglandin G/H synthase and cyclooxygenase) | 5                                                     |
| 5603    | MAPK13      | mitogen-activated protein kinase 13                                                   | 5                                                     |
| 1643    | DDB2        | damage-specific DNA binding protein 2, 48kDa                                          | 4                                                     |
| 581     | BAX         | BCL2-associated X protein                                                             | 3                                                     |
| 3588    | IL10RB      | interleukin 10 receptor, beta                                                         | 2                                                     |
| 27244   | SESN1       | sestrin 1                                                                             | 2                                                     |
| 9252    | RPS6KA5     | ribosomal protein S6 kinase, 90kDa, polypeptide 5                                     | 1                                                     |
| 5106    | PCK2        | phosphoenolpyruvate carboxykinase 2 (mitochondrial)                                   | 1                                                     |
| 2308    | FOXO1       | forkhead box O1                                                                       | 1                                                     |

Table 10: Significantly enriched pathways which are covered by the genes of the deregulated subgraph of size 25 for HT29 at 24h. The p-values were computed by using the hypergeometric distribution test (ORA) with the genes of the subgraph as test set and the genes of the regulatory graph as reference set. The p-values are FDR adjusted.

| Pathway Source | Pathway Name                                               | number of genes in subgraph | p-value (fdr) |
|----------------|------------------------------------------------------------|-----------------------------|---------------|
| KEGG           | Toll-like receptor signaling pathway                       | 8                           | 0.000248717   |
| KEGG           | Chemokine signaling pathway                                | 9                           | 0.000389392   |
| KEGG           | Jak-STAT signaling pathway                                 | 8                           | 0.00116449    |
| KEGG           | Prostate cancer                                            | 6                           | 0.00232453    |
| KEGG           | Cytokine-cytokine receptor interaction                     | 8                           | 0.00526996    |
| KEGG           | Natural killer cell mediated cytotoxicity                  | 7                           | 0.00526996    |
| KEGG           | B cell receptor signaling pathway                          | 5                           | 0.00536653    |
| KEGG           | Graft-versus-host disease                                  | 3                           | 0.0137449     |
| KEGG           | Insulin signaling pathway                                  | 6                           | 0.0178715     |
| KEGG           | Acute myeloid leukemia                                     | 4                           | 0.0180175     |
| KEGG           | Pathways in cancer                                         | 9                           | 0.0213658     |
| KEGG           | T cell receptor signaling pathway                          | 5                           | 0.0239912     |
| KEGG           | Pancreatic cancer                                          | 4                           | 0.0247014     |
| KEGG           | Epithelial cell signaling in Helicobacter pylori infection | 3                           | 0.0412548     |
| KEGG           | Small cell lung cancer                                     | 4                           | 0.0412548     |
| KEGG           | Apoptosis                                                  | 4                           | 0.0419982     |
| KEGG           | Antigen processing and presentation                        | 3                           | 0.047616      |
| KEGG           | Basal cell carcinoma                                       | 3                           | 0.047616      |
| KEGG           | Endometrial cancer                                         | 3                           | 0.047616      |
| KEGG           | Hedgehog signaling pathway                                 | 3                           | 0.047616      |

## References

- [1] Kuentzer, J., Backes, C., Blum, T., Gerasch, A., Kaufmann, M., Kohlbacher, O., and Lenhof, H.P. (2007) BNDB - The Biochemical Network Database. *BMC Bioinformatics*, **8**, 367.
- [2] Kuentzer, J., Blum, T., Gerasch, A., Backes, C., Hildebrandt, A., Kaufmann, M., Kohlbacher, O., and Lenhof, H. (2006) BN++ - a biological information system. *J Integr Bioinform*, **3**.
- [3] Kanehisa, M. and Goto, S. (2000) Kegg: kyoto encyclopedia of genes and genomes. *Nucleic Acids Res*, **28**, 27–30.
- [4] Kanehisa, M., Goto, S., Hattori, M., Aoki-Kinoshita, K.F., Itoh, M., Kawashima, S., Katayama, T., Araki, M., and Hiraoka, M. (2006) From genomics to chemical genomics: new developments in kegg. *Nucleic Acids Res*, **34**, D354–D357.
- [5] Kanehisa, M., Goto, S., Furumichi, M., Tanabe, M., and Hiraoka, M. (2010) Kegg for representation and analysis of molecular networks involving diseases and drugs. *Nucleic Acids Res*, **38**, D355–D360.
- [6] Krull, M., Pistor, S., Voss, N., Kel, A., Reuter, I., Kronenberg, D., Michael, H., Schwarzer, K., Potapov, A., Choi, C. *et al.* (2006) TRANSPATH(R): an information resource for storing and visualizing signaling pathways and their pathological aberrations. *Nucleic Acids Res*, **34**, D546–551.
- [7] Salwinski, L., Miller, C.S., Smith, A.J., Pettit, F.K., Bowie, J.U., and Eisenberg, D. (2004) The database of interacting proteins: 2004 update. *Nucleic Acids Res*, **32**, D449–D451.
- [8] Peri, S. *et al.* (2003) Development of human protein reference database as an initial platform for approaching systems biology in humans. *Genome Res*, **13**, 2363–2371.
- [9] Zanzoni, A., Montecchi-Palazzi, L., Quondam, M., Ausiello, G., Helmer-Citterich, M., and G, C. (2002) Mint: a molecular interaction database. *FEBS Lett*, **513**, 135–140.
- [10] Hermjakob, H., Montecchi-Palazzi, L., Lewington, C., Mudali, S., Kerrien, S., Orchard, S., Vingron, M., Roechert, B., Roepstorff, P., Valencia, A. *et al.* (2004) Intact - an open source molecular interaction database. *Nucleic Acids Res*, **32**, D452–D455.
- [11] Shannon, P., Markiel, A., Ozier, O., Baliga, N.S., Wang, J.T., Ramage, D., Amin, N., Schwikowski, B., and Ideker, T. (2003) Cytoscape: a software environment for integrated models of biomolecular interaction networks. *Genome Research*, **13**, 2498–2504.
- [12] Dittrich, M.T., Klau, G.W., Rosenwald, A., Dandekar, T., and Muller, T. (2008) Identifying functional modules in protein-protein interaction networks: an integrated exact approach. *Bioinformatics*, **24**, i223–231.
- [13] Ideker, T., Ozier, O., Schwikowski, B., and Siegel, A.F. (2002) Discovering regulatory and signalling circuits in molecular interaction networks. *Bioinformatics*, **18 Suppl 1**, S233–240.



- [14] Cabusora, L., Sutton, E., Fulmer, A., and Forst, C.V. (2005) Differential network expression during drug and stress response. *Bioinformatics*, **21**, 2898–2905.
- [15] Rajagopalan, D. and Agarwal, P. (2005) Inferring pathways from gene lists using a literature-derived network of biological relationships. *Bioinformatics*, **21**, 788–793.
- [16] Nacu, S., Critchley-Thorne, R., Lee, P., and Holmes, S. (2007) Gene expression network analysis and applications to immunology. *Bioinformatics*, **23**, 850–858.
- [17] Liu, M., Liberzon, A., Kong, S.W., Lai, W.R., Park, P.J., Kohane, I.S., and Kasif, S. (2007) Network-based analysis of affected biological processes in type 2 diabetes models. *PLoS Genet*, **3**, e96.
- [18] Zhao, X.M., Wang, R.S., Chen, L., and Aihara, K. (2008) Uncovering signal transduction networks from high-throughput data by integer linear programming. *Nucleic Acids Res*, **36**, e48.
- [19] Dao, P., Wang, K., Collins, C., Ester, M., Lapuk, A., and Sahinalp, S.C. (2011) Optimally discriminative subnetwork markers predict response to chemotherapy. *Bioinformatics*, **27**, i205–i213.
- [20] Vandin, F., Upfal, E., and Raphael, B.J. (2011) Algorithms for detecting significantly mutated pathways in cancer. *J Comput Biol*, **18**, 507–522.
- [21] Keller, A., Backes, C., Gerasch, A., Kaufmann, M., Kohlbacher, O., Meese, E., and Lenhof, H.P. (2009) A novel algorithm for detecting differentially regulated paths based on gene set enrichment analysis. *Bioinformatics*, **25**, 2787–2794.
- [22] Ulitsky, I., Karp, R., and Shamir, R. (2008) Detecting Disease-Specific dysregulated pathways via analysis of clinical expression profiles. In *Research in Computational Molecular Biology*. Springer Berlin / Heidelberg, pages 347–359.
- [23] Ulitsky, I., Krishnamurthy, A., Karp, R.M., and Shamir, R. (2010) DEGAS: de novo discovery of dysregulated pathways in human diseases. *PLoS ONE*, **5**, e13367.
- [24] Qiu, Y., Zhang, S., Zhang, X., and Chen, L. (2010) Detecting disease associated modules and prioritizing active genes based on high throughput data. *BMC Bioinformatics*, **11**, 26–26.
- [25] Su, J., Yoon, B., and Dougherty, E.R. (2010) Identification of diagnostic subnetwork markers for cancer in human protein-protein interaction network. *BMC Bioinformatics*, **11**, S8–S8.
- [26] Fortney, K., Kotlyar, M., and Jurisica, I. (2010) Inferring the functions of longevity genes with modular subnetwork biomarkers of caenorhabditis elegans aging. *Genome Biol.*, **11**, R13–R13.
- [27] Wu, Z., Zhao, X., and Chen, L. (2010) A systems biology approach to identify effective cocktail drugs. *BMC Syst Biol.*, **4**, S7–S7.
- [28] Chowdhury, S.A. and Koyutrk, M. (2010) Identification of coordinately dysregulated subnetworks in complex phenotypes. *Pacific Symposium on Biocomputing. Pacific Symposium on Biocomputing*, 133–144.
